# Supplementary material for: A conductive PEDOT/alginate porous scaffold as a platform to modulate the biological behaviors of brown adipose-derived stem cells
Source: Royal Society of Chemistry journal article supplement (doi:10.1039/c9bm02012h), 2020-01-01
Supplement: c9bm02012h1.pdf [file c9bm02012h1.pdf]

*Supplementary Information*

**Conductive PEDOT/Alginate Porous Scaffold as a Platform to  
Modulate the Biological Behaviors of Brown Adipose-Derived Stem  
Cells**

Boguang Yang<sup>a,b</sup>, Fanglian Yao<sup>a,d</sup>, Lei Ye<sup>a</sup>, Tong Hao<sup>b</sup>, Yabin Zhang<sup>a</sup>, Lei Zhang<sup>c</sup>, Dianyu Dong<sup>a</sup>,

Wancai Fang<sup>a</sup>, Yan Wang<sup>b</sup>, Xiaoyang Zhang<sup>a</sup>, Changyong Wang<sup>b\*</sup>, Junjie Li<sup>a,b,d\*</sup>

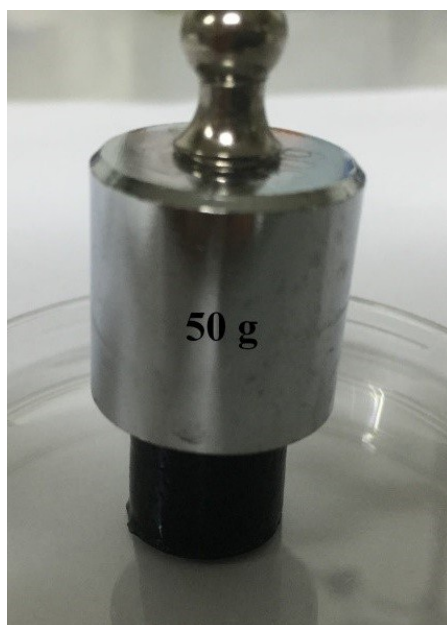

**Figure S1.** PEDOT<sub>5</sub>Alg<sub>5</sub> hydrogel is capable of bearing the 50 g of weight.

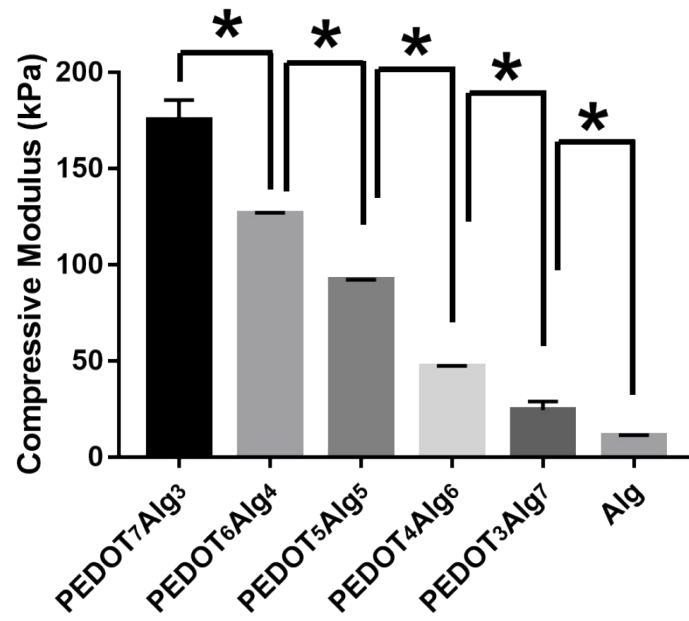

**Figure S2.** Compressive modulus of PEDOT/Alg scaffolds. n = 6 independent measurements per group; \*p < 0.05.

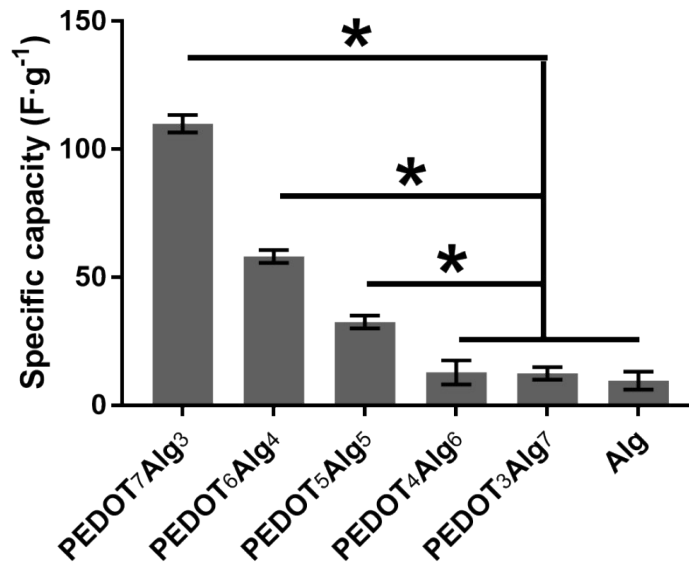

**Figure S3.** Specific capacity of the PEDOT/Alg scaffolds. n = 6 independent measurements per group; \*p < 0.05.

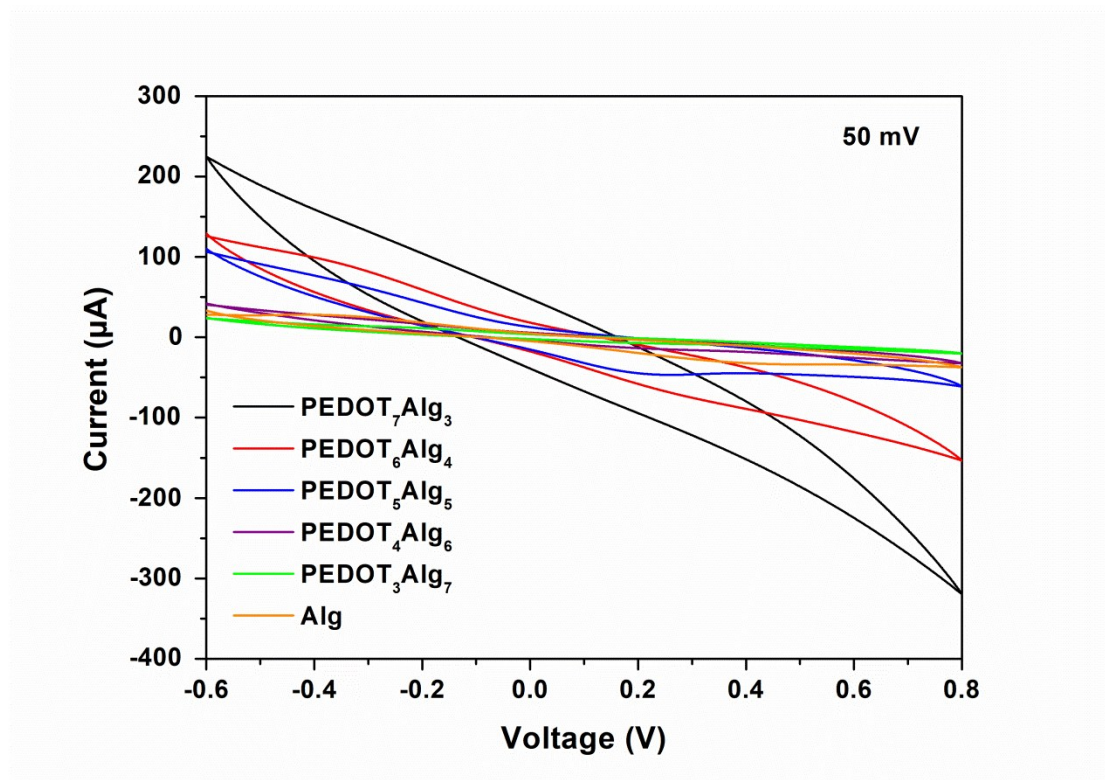

**Figure S4.** CV curves of PEDOT/Alg scaffolds at a scan rate of 50 mV/s.

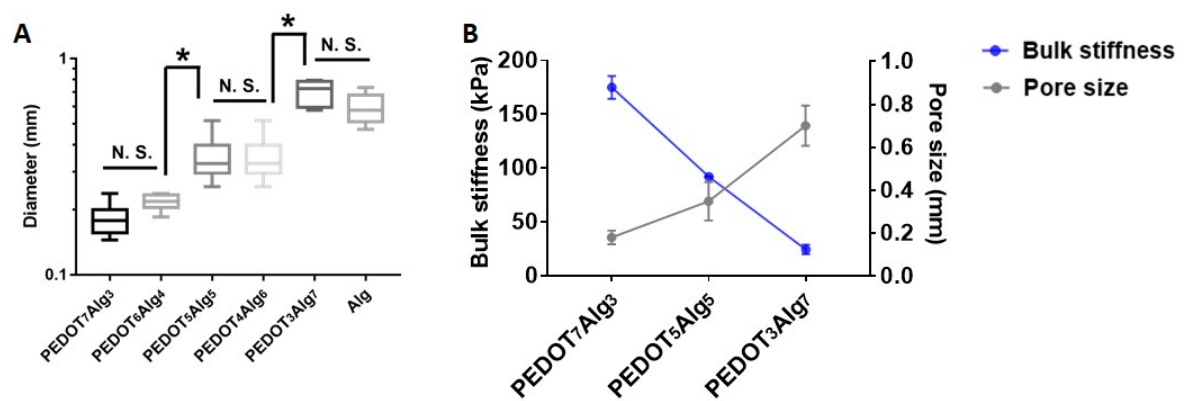

**Figure S5.** (A) Pores size of the PEDOT/Alg scaffolds.  $n = 10\text{--}20$  pores;  $*p < 0.05$ , N.S. indicates no statistical difference. (B) Stiffness control using varied ratios of PEDOT/Alg caused a change in scaffold pore size (stiffness,  $n = 6$ ; pore size,  $n = 10\text{--}20$ ).

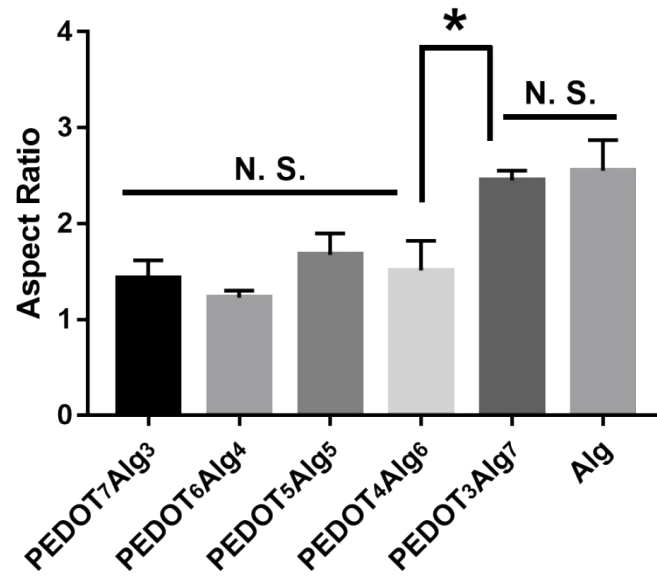

**Figure S6.** Aspect ratio of the pores in the PEDOT/Alg scaffolds. n = 10–20 pores; \*p < 0.05, N.S. indicates no statistical difference.

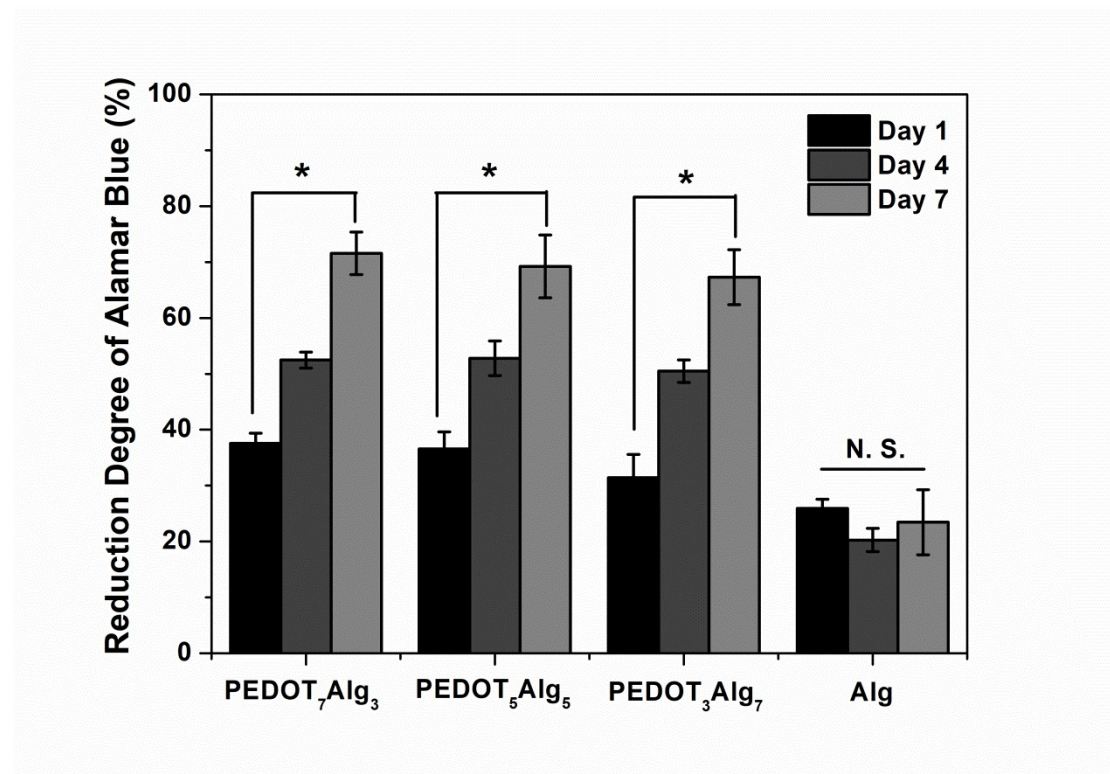

**Figure S7.** Proliferative behaviors of BADSCs seeded in PEDOT/Alg scaffolds. n= 6 independent measurements, mean ± s.d., from 2 biologically independent experiments.

\*p < 0.05, N.S. indicates no statistical difference.

## Pure Alginate scaffold

## Nucleus

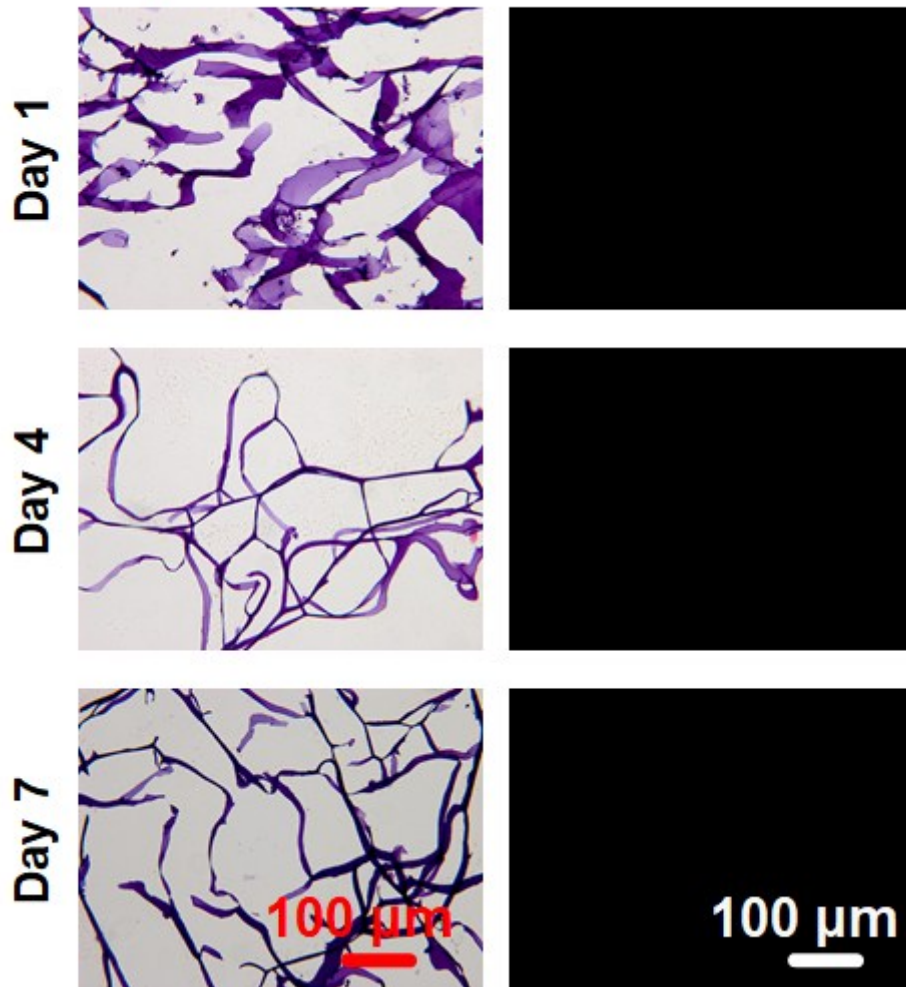

**Figure S8.** Fluorescence staining of BADSCs cultured in pure alginate scaffolds at day 1, 4 and 7. (Blue: Nucleus)

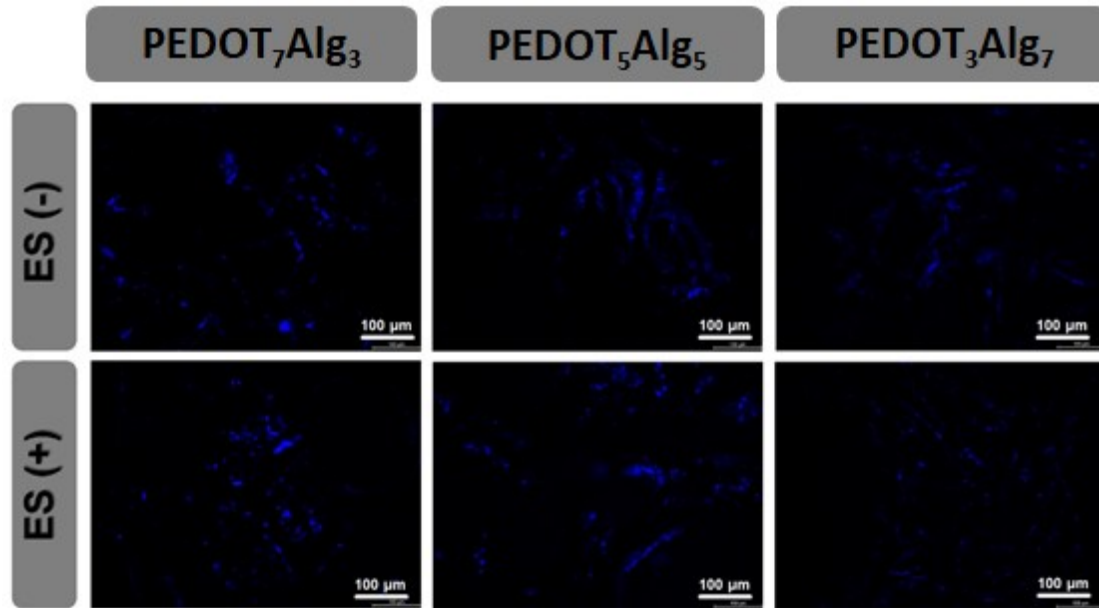

**Figure S9.** cTnT immunofluorescence staining of BADSCs cultured in PEDOT/Alg scaffolds at day 1. (Blue: Nucleus; Green: cTnT)

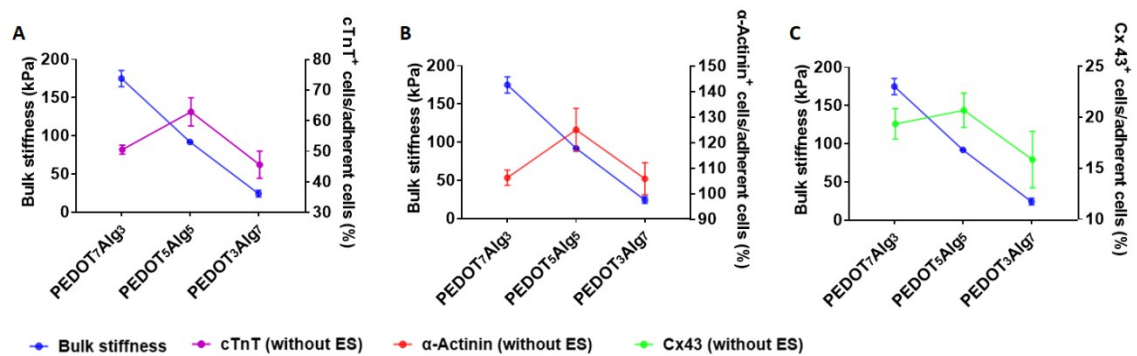

**Figure S10.** (A) The relative cTnT<sup>+</sup> fluorescence density of cells in PEDOT/Alg scaffold after 7d changed with bulk stiffness (without electrical stimulation) (B) The relative α-actinin<sup>+</sup> fluorescence density of cells in PEDOT/Alg scaffold after 7d changed with bulk stiffness (without electrical stimulation) (C) The relative Cx43<sup>+</sup> fluorescence density of cells in PEDOT/Alg scaffold after 7d changed with bulk stiffness (without electrical stimulation)
